# Supplementary material for: The Development and Validation of the Empathy Components Questionnaire (ECQ)
Source: PLoS One. 2017 Jan 11;12(1):e0169185. doi: 10.1371/journal.pone.0169185 (PMC5226785; doi:10.1371/journal.pone.0169185)
Supplement: S1 Data — (XLSX) [file pone.0169185.s002.xlsx]

## Sheet: Sheet1
Age	Sex (1 male; 2 female)	Language: English	Student	ECQ1	ECQ2	ECQ3	ECQ4	ECQ5	ECQ6	ECQ7	ECQ8	ECQ9	ECQ10	ECQ11	ECQ12	ECQ13	ECQ14	ECQ15	ECQ16	ECQ17	ECQ18	ECQ19	ECQ20	ECQ21	ECQ22	ECQ23	ECQ24	ECQ25	ECQ26	ECQ27	ECQ28	ECQ29	ECQ30	ECQ31	ECQ32	ECQ33	ECQ34	ECQ35	ECQ36	ECQ37	ECQ38	ECQ39
27	1	Yes	Yes	3	1	2	2	3	3	4	2	2	3	2	3	3	3	3	3	4	2	2	2	1	3	3	2	3	4	2	3	4	3	2	3	2	2	2	3	3	3	2
19	2	Yes	Yes	4	4	4	4	4	3	4	3	3	4	4	4	4	3	2	2	4	2	3	2	3	2	3	2	3	2	4	3	3	3	2	3	4	3	2	3	3	3	3
19	2	Yes	Yes	3	4	3	4	4	4	3	4	3	1	3	4	4	4	2	4	4	4	3	4	4	4	4	3	4	4	3	4	3	4	4	4	4	4	2	4	4	4	4
20	1	Yes	Yes	3	2	2	4	4	3	4	3	4	3	3	3	3	2	4	2	3	2	3	2	1	3	4	2	4	4	3	3	4	4	2	3	2	4	3	2	3	4	3
20	2	Yes	Yes	3	4	3	3	3	3	3	3	3	4	3	3	3	3	3	3	4	3	3	3	3	4	3	3	4	3	3	3	4	3	3	3	3	3	3	4	4	3	3
21	2	Yes	Yes	4	2	4	3	3	4	2	4	4	4	3	4	4	4	2	4	3	3	3	3	3	4	3	4	4	4	3	4	3	3	4	4	4	3	2	4	4	4	4
20	2	Yes	Yes	3	3	4	3	3	4	3	2	2	4	4	4	4	3	3	4	2	2	2	3	3	3	3	3	3	3	4	3	3	3	3	3	2	2	2	4	3	2	4
19	2	Yes	Yes	3	2	3	3	4	4	4	3	3	3	3	3	3	4	3	3	3	4	3	3	3	3	3	4	3	3	3	4	3	3	3	3	3	3	3	4	4	3	4
20	2	Yes	Yes	3	1	3	4	3	3	4	3	3	4	4	4	4	1	2	3	4	3	3	2	3	4	3	2	3	4	3	3	3	4	2	3	3	4	2	4	3	3	3
19	1	Yes	Yes	4	4	4	3	4	4	4	2	3	1	4	4	4	3	2	3	3	3	4	3	4	4	3	3	3	3	4	3	3	3	2	3	3	3	1	4	4	1	4
20	2	Yes	Yes	4	3	4	3	2	4	3	3	3	4	4	3	4	2	3	2	3	2	3	3	3	3	4	3	3	3	4	3	3	3	2	3	3	3	3	3	4	2	2
19	1	Yes	Yes	2	4	2	4	2	2	3	1	2	2	2	3	3	3	2	2	2	4	2	4	3	3	2	3	2	4	2	4	2	2	2	3	1	4	1	2	1	2	2
21	1	Yes	Yes	2	2	3	3	4	1	3	4	4	4	2	4	4	2	4	2	3	3	2	1	2	4	3	2	3	3	4	4	3	3	4	2	3	3	3	3	2	3	4
19	2	No	Yes	3	2	4	3	4	4	4	3	4	4	4	4	4	2	4	3	4	2	3	1	4	4	4	4	4	4	3	4	4	4	2	4	4	4	3	4	3	4	4
20	2	Yes	Yes	2	3	3	4	4	4	3	4	2	4	4	4	4	2	3	3	3	3	2	3	3	4	3	3	2	4	4	4	4	2	3	3	3	3	4	4	3	4	3
21	2	Yes	Yes	3	3	3	3	3	3	3	4	3	4	3	4	4	3	2	3	3	4	3	3	3	4	3	4	2	3	3	3	2	3	4	3	3	3	2	3	3	3	3
21	2	Yes	Yes	3	3	4	4	4	3	3	3	3	3	4	4	4	2	3	3	3	3	2	3	3	3	3	3	2	4	4	4	3	3	4	3	2	3	3	4	3	3	3
20	1	Yes	Yes	3	1	3	4	3	4	3	4	4	4	3	3	4	1	3	3	4	2	2	3	2	3	4	1	4	3	3	3	2	3	2	3	3	3	2	3	3	3	3
20	2	Yes	Yes	3	2	3	3	4	3	3	4	3	3	3	4	4	3	3	3	3	2	2	2	3	3	3	3	2	3	3	3	2	4	2	3	3	3	3	3	4	2	4
19	2	Yes	Yes	3	4	3	4	4	2	2	4	2	3	3	4	3	3	2	1	2	3	1	3	4	4	1	3	2	3	2	3	2	2	3	3	3	3	3	3	3	1	4
20	2	Yes	Yes	3	3	4	3	3	4	4	4	3	4	4	4	4	4	3	3	3	4	4	3	4	4	4	4	3	3	4	4	4	4	4	4	4	3	4	4	3	3	4
19	1	Yes	Yes	2	2	3	3	4	4	4	4	4	1	3	4	4	4	4	3	3	3	4	3	3	4	4	3	4	4	4	4	4	3	3	3	3	4	3	4	3	3	3
21	1	Yes	Yes	3	3	3	4	2	3	4	4	2	3	2	4	4	2	4	2	2	4	2	2	2	3	3	2	2	3	2	2	4	2	3	3	2	2	2	3	3	2	3
20	1	Yes	Yes	3	1	3	2	2	3	3	3	2	3	3	2	3	2	2	3	3	2	2	2	2	2	2	2	3	2	3	3	2	2	2	3	3	1	2	3	3	3	2
21	2	Yes	Yes	4	4	4	4	4	4	4	4	4	4	4	4	4	4	4	4	4	4	4	4	4	4	4	4	4	4	4	4	4	4	4	4	4	3	3	4	4	4	4
21	2	Yes	Yes	3	4	4	3	3	3	4	4	4	4	4	4	4	3	3	4	4	3	3	3	3	3	4	3	4	4	4	4	4	4	3	3	3	3	3	4	3	3	2
20	2	Yes	Yes	3	4	3	3	3	3	4	3	3	3	4	4	3	2	3	2	2	3	3	2	2	4	4	3	3	3	3	3	3	3	3	3	2	3	3	3	3	3	4
20	2	Yes	Yes	2	4	3	2	3	4	2	3	3	3	2	4	3	4	2	1	3	3	2	4	3	3	3	3	2	4	2	3	3	3	3	3	3	4	2	4	2	2	2
19	2	Yes	Yes	3	3	3	3	3	3	4	3	3	3	4	3	4	3	3	3	3	3	3	2	3	2	4	2	3	3	3	3	3	3	2	3	3	3	2	3	3	2	3
20	2	Yes	Yes	3	4	2	3	3	2	2	3	2	3	3	4	3	2	4	2	3	3	2	3	2	3	3	2	2	3	3	3	2	2	4	3	3	3	3	2	1	3	3
21	2	Yes	Yes	3	4	3	4	4	4	4	3	3	2	3	4	4	2	3	4	3	3	3	3	3	4	3	3	3	4	3	4	3	3	4	3	3	3	3	3	3	4	3
20	2	Yes	Yes	3	3	4	3	3	3	4	2	4	4	3	3	4	2	3	4	4	2	3	1	2	4	3	2	2	4	4	3	4	4	2	4	3	3	4	3	3	2	4
20	2	Yes	Yes	3	2	2	2	4	4	4	4	3	3	2	2	4	3	2	3	3	3	1	2	3	4	4	3	3	3	1	2	2	3	1	4	3	3	3	4	2	2	2
19	2	Yes	Yes	3	2	3	4	4	4	3	4	2	4	4	4	4	2	3	2	3	2	2	2	3	3	3	3	3	4	3	4	4	4	3	3	3	4	3	3	2	3	3
19	1	Yes	Yes	3	2	3	2	4	3	2	3	3	4	3	3	4	2	1	2	3	2	3	2	2	3	4	2	3	4	2	3	4	3	2	3	2	3	3	3	3	1	3
20	1	Yes	Yes	3	2	3	4	4	4	4	4	3	4	3	4	4	2	3	3	3	3	2	3	3	4	3	3	2	4	3	4	3	3	3	3	3	3	2	4	3	3	4
21	2	Yes	No	3	3	2	3	3	4	3	4	2	4	4	4	4	2	3	3	4	3	2	3	4	3	3	3	4	3	4	4	2	3	4	4	3	3	3	4	3	4	3
19	1	Yes	Yes	4	4	3	4	4	3	4	1	3	3	3	4	4	4	3	3	4	4	3	3	4	4	3	4	4	3	3	4	4	4	3	3	3	3	2	3	3	3	4
20	2	Yes	Yes	3	3	3	3	3	4	4	4	2	4	3	4	3	3	3	3	3	3	3	2	2	4	3	3	3	3	3	3	3	3	3	3	3	3	3	3	3	2	3
20	1	Yes	Yes	4	1	2	3	4	3	3	4	2	4	2	4	4	3	2	4	3	3	2	1	2	3	3	3	2	4	2	3	3	2	2	3	4	4	3	4	4	2	4
20	2	Yes	Yes	3	3	4	3	3	4	3	4	2	1	4	3	4	2	2	4	3	3	3	4	3	4	4	3	4	4	4	4	3	3	3	4	4	4	2	4	4	4	4
19	2	Yes	Yes	3	3	3	4	4	3	3	4	3	4	4	4	4	4	4	3	4	4	3	4	4	4	3	3	3	3	3	4	4	4	4	3	4	4	4	4	4	4	4
20	2	Yes	Yes	2	3	3	4	4	4	4	2	3	3	4	4	4	4	2	3	2	3	2	2	2	3	3	4	2	4	4	3	4	3	2	4	2	2	2	4	3	2	4
20	1	Yes	Yes	3	1	2	3	3	4	3	4	2	4	2	4	3	3	2	3	3	3	1	2	2	3	3	4	2	2	2	3	3	2	3	2	2	3	2	4	3	3	3
25	2	Yes	Yes	3	3	3	3	4	3	2	3	2	4	3	4	4	3	3	2	3	2	2	3	2	4	3	4	3	4	3	4	3	2	3	3	3	4	2	2	3	4	2
19	2	Yes	Yes	3	3	3	4	4	4	4	2	4	4	3	4	4	4	3	3	4	4	2	3	3	4	3	4	4	3	3	4	3	3	3	3	2	3	3	3	3	3	3
22	1	Yes	Yes	4	2	4	3	3	3	3	4	4	1	4	1	4	1	4	4	4	1	2	1	4	3	4	3	4	4	4	4	3	3	1	4	3	2	3	4	1	4	3
23	1	Yes	No	3	3	4	3	4	4	3	3	3	4	2	4	3	3	3	4	3	3	3	3	2	4	3	3	3	4	2	3	3	3	3	4	3	3	2	3	4	2	4
23	2	Yes	Yes	3	3	3	4	4	3	4	3	4	4	4	4	4	3	3	2	3	3	3	2	3	4	4	3	3	4	4	3	4	4	3	3	3	4	4	3	3	3	4
19	1	Yes	Yes	2	4	3	3	2	2	2	3	2	3	3	4	3	3	3	2	2	3	1	3	3	3	3	4	2	2	3	3	3	2	2	3	2	2	4	4	2	3	2
21	2	Yes	Yes	3	4	3	4	3	3	4	4	2	1	3	4	4	3	2	3	3	3	1	3	2	3	3	2	3	4	3	3	4	4	1	4	3	3	4	3	3	3	4
21	2	Yes	Yes	2	3	3	4	4	4	4	3	3	3	1	3	4	3	3	2	3	3	4	3	2	4	4	3	3	4	2	3	3	3	3	3	2	3	4	3	3	3	3
21	2	No	Yes	3	4	3	3	4	4	4	3	3	2	3	4	4	3	3	3	3	3	3	4	3	3	2	3	2	4	3	3	3	2	4	3	2	3	3	3	2	3	3
21	1	No	Yes	2	3	3	4	4	2	4	2	3	2	2	4	4	3	3	2	3	3	3	4	3	4	4	3	3	4	1	3	4	4	3	3	2	2	3	1	2	2	4
32	2	Yes	No	3	3	3	3	3	3	3	3	4	4	4	3	4	3	3	3	3	3	3	3	3	3	3	3	3	3	3	3	3	3	3	3	3	3	3	3	3	3	3
19	2	Yes	Yes	3	3	3	3	3	3	3	3	2	2	3	3	3	3	2	3	3	3	3	2	3	3	2	3	3	3	3	3	3	3	2	3	3	3	3	3	3	3	3
23	2	No	Yes	2	4	4	4	4	3	1	4	4	3	4	4	1	4	2	2	1	4	3	3	4	1	3	4	1	4	4	4	4	4	4	4	2	4	4	4	1	4	4
20	2	Yes	Yes	3	3	3	3	4	4	3	3	2	3	4	2	4	1	2	3	3	3	2	4	3	4	3	4	2	3	3	4	3	3	3	3	3	4	2	3	3	2	3
19	2	Yes	Yes	3	2	2	3	4	3	4	3	2	3	2	3	2	2	2	2	3	3	2	2	2	4	3	2	3	3	2	2	3	3	3	2	2	3	2	3	2	2	3
19	2	Yes	Yes	3	4	4	4	4	3	4	3	3	4	4	4	3	3	3	3	3	4	3	3	3	4	3	3	3	3	3	3	3	3	2	3	3	3	3	3	3	3	3
19	2	Yes	Yes	2	4	3	4	4	3	3	3	3	3	3	4	4	4	3	3	3	4	3	4	4	4	3	3	2	4	3	4	3	3	3	4	3	3	3	4	3	3	4
19	1	Yes	Yes	3	3	3	4	3	3	4	3	4	3	3	4	4	3	3	3	3	3	2	2	2	4	4	3	3	4	3	3	4	3	3	3	3	3	3	3	3	3	4
19	2	Yes	Yes	3	3	3	3	2	2	2	2	2	3	2	3	4	2	3	3	4	3	2	3	2	3	3	3	3	3	2	3	2	2	3	3	3	3	3	3	3	3	2
21	2	Yes	Yes	1	3	2	3	3	2	3	4	2	4	4	4	4	3	4	2	4	3	2	3	3	4	4	3	3	3	3	4	3	2	3	3	3	2	3	3	3	4	4
19	2	Yes	Yes	3	3	4	4	4	4	4	3	3	4	3	4	4	4	2	4	3	4	3	4	3	4	3	4	4	4	3	4	3	4	4	4	3	4	4	4	4	3	4
20	1	No	Yes	3	3	2	2	2	3	3	2	2	3	2	2	2	3	1	3	3	2	3	2	2	3	4	3	3	3	1	2	3	3	2	3	3	2	2	3	3	2	4
20	2	Yes	Yes	2	4	1	2	2	3	3	4	4	4	2	4	3	3	2	2	3	3	1	4	2	4	3	4	3	4	2	3	3	3	3	3	2	3	2	3	2	2	3
20	1	Yes	Yes	2	3	1	3	1	1	2	1	2	2	3	3	2	2	1	1	3	2	2	3	1	3	3	2	2	1	2	2	3	2	2	2	2	1	1	2	2	1	3
18	2	Yes	Yes	3	3	3	3	3	3	3	3	1	4	3	4	3	3	1	4	2	3	2	1	2	4	3	3	3	3	3	3	3	3	2	3	3	3	2	3	3	1	3
19	1	Yes	Yes	3	2	3	4	3	4	4	4	4	4	4	4	4	3	2	3	3	3	3	3	3	3	4	3	4	3	4	3	4	4	2	3	3	3	3	3	3	3	3
20	1	Yes	Yes	4	1	4	3	4	4	4	4	4	4	3	3	4	1	3	3	4	1	3	3	1	2	4	1	4	2	4	4	4	4	2	4	3	4	3	4	3	4	3
19	2	Yes	Yes	3	3	3	3	3	4	3	4	3	4	3	4	4	3	3	3	4	3	3	3	3	3	3	3	3	3	3	3	3	3	3	3	3	3	3	4	4	3	4
21	1	No	Yes	3	1	3	1	3	4	3	1	3	4	2	2	2	2	1	3	4	1	2	1	2	3	4	2	3	3	2	1	4	3	1	3	3	3	3	3	3	3	4
19	1	Yes	Yes	3	2	3	3	3	4	3	4	2	3	3	4	3	3	2	2	2	3	2	3	3	3	3	3	3	3	2	3	3	4	2	3	3	3	2	3	3	3	2
20	1	Yes	Yes	3	4	3	4	4	3	4	3	2	4	3	4	4	2	3	3	2	3	3	2	2	3	2	3	3	4	4	4	3	3	2	3	3	4	4	3	4	3	3
20	2	Yes	Yes	3	3	3	4	3	3	4	3	2	4	4	4	4	3	2	3	3	3	3	2	3	4	3	3	4	4	3	4	3	3	3	4	3	3	2	3	3	3	3
20	2	Yes	Yes	3	4	2	3	4	3	3	3	3	2	3	3	4	2	3	2	2	4	2	3	2	3	4	3	1	3	3	3	4	3	2	2	3	2	3	3	2	2	3
19	2	No	Yes	3	1	3	1	1	3	4	4	2	3	3	3	3	3	1	2	3	2	2	1	2	2	3	1	3	2	3	2	3	3	2	2	3	2	3	3	2	2	2
20	2	Yes	Yes	3	3	3	4	3	4	3	3	2	2	4	4	2	3	1	4	3	4	2	4	3	4	2	3	3	4	4	4	3	2	4	4	2	2	2	4	4	4	4
19	2	Yes	Yes	3	4	4	4	4	4	3	4	4	4	4	4	4	3	3	3	2	4	2	3	4	4	3	4	3	4	4	4	3	3	3	4	2	4	2	4	3	3	4
20	2	Yes	Yes	3	3	4	4	4	4	4	3	3	3	4	4	4	3	2	4	3	3	3	3	4	4	3	4	3	4	4	4	3	3	3	4	3	2	3	3	3	3	3
24	2	Yes	No	2	4	3	4	4	3	4	2	4	4	4	4	4	4	4	3	4	4	3	4	4	4	4	4	3	3	4	3	4	4	4	3	3	3	3	3	3	4	4
20	2	Yes	Yes	4	3	4	3	4	3	4	3	2	4	3	4	4	3	3	3	3	3	3	3	3	3	3	4	4	3	3	4	3	4	2	4	3	4	3	4	3	3	3
20	2	No	Yes	3	2	4	4	4	4	4	4	3	3	4	4	4	3	3	3	3	4	3	3	3	4	4	3	3	4	4	4	3	4	3	3	3	4	3	4	3	4	4
19	2	Yes	Yes	2	3	3	3	3	3	3	2	3	3	4	4	3	2	2	3	3	3	3	3	3	3	3	3	3	3	3	3	3	3	3	2	2	3	3	3	3	3	4
20	2	Yes	Yes	3	3	3	4	2	4	3	3	3	3	2	4	3	3	3	3	3	3	1	4	3	3	3	3	3	4	2	3	3	3	2	3	3	3	3	4	3	3	3
19	2	Yes	Yes	3	3	4	4	4	4	3	4	2	4	4	4	4	1	4	3	3	3	2	2	4	4	4	3	3	4	4	4	3	3	2	3	3	3	4	4	3	4	3
20	2	Yes	Yes	3	4	4	3	3	4	3	4	3	3	3	4	3	4	2	3	4	4	2	4	4	3	3	4	3	4	3	4	3	4	4	3	3	4	4	3	4	3	4
20	1	yes	yes	3	2	2	2	1	3	3	3	2	3	4	4	4	2	4	3	3	3	2	2	2	4	2	3	2	2	3	4	1	1	3	3	2	3	3	3	4	4	4
20	1	No	Yes	3	2	3	3	3	3	4	4	3	1	3	4	3	3	1	3	4	3	2	2	2	4	4	2	3	2	3	2	4	3	2	3	2	2	3	3	3	1	3
19	1	Yes	Yes	4	4	4	4	4	4	3	4	3	4	3	4	3	2	3	4	3	2	1	3	2	4	4	2	3	4	4	4	3	3	2	4	4	3	3	4	4	3	4
19	1	Yes	Yes	3	3	4	3	3	4	3	4	2	4	3	4	4	3	3	4	3	3	1	3	3	4	3	3	1	4	3	4	3	3	4	4	3	3	1	4	4	3	3
21	1	Yes	Yes	3	2	3	4	3	4	3	4	4	4	4	3	3	2	2	3	3	2	2	2	2	3	3	2	3	4	3	3	3	3	2	3	4	4	2	4	3	3	3
22	2	Yes	no	2	3	3	4	3	3	4	4	4	1	3	4	4	3	4	3	3	4	3	4	4	4	3	4	3	4	3	4	3	3	4	4	3	2	3	4	2	3	4
27	1	Yes	Yes	3	1	2	2	4	3	4	3	3	3	2	3	4	2	3	3	4	1	2	1	1	3	4	2	3	4	2	2	4	2	3	1	3	3	2	3	4	3	1
20	2	Yes	Yes	3	3	2	2	2	4	4	4	4	3	2	3	1	4	3	3	4	3	3	3	2	4	4	4	3	3	2	3	4	4	2	3	3	3	4	3	2	1	4
20	1	Yes	Yes	3	3	3	4	3	2	4	4	4	4	4	3	3	2	4	3	4	2	4	2	2	3	4	3	4	3	4	3	4	4	2	3	4	4	4	3	4	3	3
20	1	Yes	Yes	3	3	2	2	2	3	4	4	1	4	2	3	3	1	4	2	4	2	2	2	3	3	4	3	3	2	2	3	3	3	2	2	2	2	3	3	2	3	3
21	1	No	Yes	3	1	2	4	3	2	3	4	2	3	2	4	1	2	4	4	3	2	3	1	3	4	4	3	3	4	2	3	3	2	3	3	3	1	2	4	3	3	4
20	2	Yes	Yes	3	2	4	3	3	4	4	4	3	4	4	3	3	4	3	4	4	4	3	2	4	4	3	3	4	4	4	4	3	4	3	4	4	3	2	4	3	3	4
19	2	No	Yes	2	2	3	4	3	4	2	3	3	4	4	4	4	2	2	4	3	3	3	3	3	3	3	4	4	4	4	4	3	4	3	4	3	3	3	4	3	3	3
