# Supplementary material for: The Development and Validation of the Empathy Components Questionnaire (ECQ)
Source: PLoS One. 2017 Jan 11;12(1):e0169185. doi: 10.1371/journal.pone.0169185 (PMC5226785; doi:10.1371/journal.pone.0169185)
Supplement: S2 Data — (XLSX) [file pone.0169185.s003.xlsx]

## Sheet: Sheet1
Age	Sex	Language: English	Student (1 = no)	ECQ1	ECQ2	ECQ3	ECQ4	ECQ5	ECQ6	ECQ7	ECQ8	ECQ9	ECQ10	ECQ11	ECQ12	ECQ13	ECQ14	ECQ15	ECQ16	ECQ17	ECQ18	ECQ19	ECQ20	ECQ21	ECQ22	ECQ23	ECQ24	ECQ25	ECQ26	ECQ27	ECQ28	ECQ29	ECQ30	ECQ31	ECQ32	ECQ33	ECQ34	ECQ35	ECQ36	ECQ37	SI1	SI2	SI3	SI4	SI5	SI6	SI7	SI8	SI9
26	1	Yes	1	4	4	4	4	4	4	4	4	4	4	2	3	4	4	4	4	4	4	4	4	4	4	4	4	4	4	4	2	4	4	4	4	4	4	4	4	4	5	5	5	5	5	5	5	5	5
38	1	Yes	1	4	4	3	4	2	3	3	4	3	3	2	3	4	4	4	4	4	3	3	3	4	3	3	3	3	3	3	3	3	3	3	2	3	3	3	3	3	3	3	4	3	3	3	4	4	4
21	2	Yes	2	4	4	3	4	3	3	3	4	3	4	3	3	4	3	3	4	3	3	3	3	3	3	4	3	3	3	3	3	3	3	3	2	3	3	3	4	3	5	4	4	4	4	5	5	5	5
26	2	Yes	2	4	4	3	4	3	4	3	3	3	3	2	2	3	3	4	3	3	3	3	3	3	4	3	3	3	3	2	3	3	3	3	2	3	3	3	3	3	4	4	4	4	4	4	5	5	5
27	2	Yes	1	4	4	3	4	3	4	4	4	4	3	3	3	4	4	4	3	4	3	4	4	4	4	4	4	4	4	4	3	4	4	4	2	4	4	3	4	4	5	4	5	4	5	5	5	5	5
35	1	Yes	1	3	3	3	4	3	3	3	3	3	3	2	2	3	3	3	4	4	2	3	3	3	3	3	3	3	3	2	3	3	3	3	2	3	3	3	3	3	5	4	4	3	4	4	5	5	4
30	2	Yes	1	3	2	3	3	3	3	2	3	2	2	2	3	2	3	3	3	3	2	3	3	2	2	3	3	2	3	2	2	2	2	2	2	3	3	2	2	3	3	4	5	4	3	4	4	5	3
26	2	Yes	1	4	4	3	4	4	3	3	4	4	4	1	3	3	3	3	4	3	4	3	3	3	3	3	3	3	3	3	2	3	3	3	2	3	3	3	3	3	5	5	5	5	5	5	5	5	5
22	2	Yes	2	3	3	3	3	2	2	2	4	3	3	2	3	3	3	3	3	3	3	3	3	4	3	3	3	3	3	3	2	3	3	2	3	4	3	2	3	3	4	4	4	4	4	4	4	4	4
51	2	Yes	1	4	4	4	4	3	3	3	4	4	4	1	3	4	4	4	4	4	4	4	4	4	4	4	4	4	4	4	2	4	4	3	3	4	4	3	4	4	5	5	5	5	5	5	5	5	5
31	2	No	2	4	4	3	3	3	3	3	3	3	3	2	2	2	3	3	3	3	3	3	3	3	3	3	3	2	3	2	2	3	3	3	2	2	3	3	3	3	4	3	3	2	3	3	4	4	3
23	1	Yes	2	4	4	4	4	4	4	4	4	4	3	3	4	4	3	4	4	4	3	4	4	3	2	4	4	4	4	4	3	4	4	4	3	4	3	4	4	4	5	5	5	5	5	5	5	5	5
28	2	Yes	1	4	4	4	4	4	4	4	4	4	4	1	4	4	4	4	3	4	4	4	4	4	4	4	3	4	4	3	1	4	4	4	4	4	4	4	4	4	5	4	4	4	5	5	5	5	5
25	2	No	2	3	4	3	4	2	3	3	3	3	3	3	2	3	3	3	3	3	2	3	3	3	3	3	3	3	3	3	3	3	3	3	2	3	3	3	2	3	4	3	4	4	4	4	4	4	4
19	1	Yes	2	3	3	3	3	2	2	3	4	3	2	1	2	3	3	3	3	3	2	3	3	3	3	3	3	3	3	2	2	3	3	3	2	3	2	3	3	3	5	4	5	5	4	5	5	4	4
24	2	Yes	1	3	4	3	4	3	3	3	4	3	3	2	3	4	3	3	4	3	4	3	4	4	4	3	3	3	3	3	2	3	3	3	2	4	3	3	4	3	5	4	4	5	5	5	5	5	5
21	1	Yes	2	2	3	3	4	3	3	3	4	3	3	2	3	4	3	3	4	3	2	3	3	3	4	4	3	4	3	2	2	3	3	3	3	4	3	3	4	3	5	4	4	3	4	4	5	5	4
44	2	Yes	2	4	3	3	4	3	3	3	4	3	3	2	4	4	3	4	4	4	3	3	3	4	2	4	3	3	4	4	3	4	3	3	1	3	3	3	3	4	3	3	3	3	4	4	5	5	4
29	1	Yes	1	4	3	3	4	3	3	4	4	4	4	2	4	4	4	4	4	4	3	3	3	3	2	4	4	3	3	3	3	3	3	3	3	3	3	3	3	4	2	2	3	3	4	3	5	5	4
29	2	Yes	1	3	4	4	4	4	4	4	4	4	4	2	4	4	3	4	4	4	3	4	4	4	4	4	4	4	4	4	4	4	4	4	2	4	4	4	4	3	5	5	5	5	5	5	5	5	5
36	2	Yes	1	4	4	3	4	3	3	3	4	3	4	3	3	4	3	4	4	3	4	4	4	4	4	4	4	3	4	4	4	4	4	4	1	4	3	2	3	3	5	4	4	4	3	3	5	5	5
27	1	Yes	1	2	4	3	3	3	3	3	4	4	3	1	3	3	2	3	3	3	2	3	3	2	1	3	3	3	3	2	2	3	3	3	2	2	4	3	3	3	5	4	4	3	1	3	4	5	4
45	1	Yes	1	3	3	3	3	3	3	3	3	3	3	2	2	3	3	3	3	2	3	3	2	2	3	3	3	2	3	2	1	3	3	2	3	3	3	3	3	3	3	4	4	4	3	4	4	4	4
30	2	Yes	2	4	2	3	2	3	2	2	3	3	2	2	4	2	3	3	3	3	2	3	3	2	3	3	3	2	3	1	1	3	3	3	2	3	3	3	3	3	2	3	4	3	3	4	4	3	2
29	1	Yes	1	4	4	4	4	3	4	4	4	4	4	1	2	4	3	4	4	3	4	4	4	4	4	4	4	4	4	4	2	4	4	3	2	4	3	4	4	3	5	4	3	4	5	5	5	5	5
24	2	Yes	1	4	3	3	3	3	3	3	4	3	3	1	4	3	4	4	4	4	3	3	3	4	3	4	4	4	4	3	1	4	3	3	1	4	3	3	3	4	4	4	4	3	3	3	5	5	5
25	2	Yes	1	3	3	3	2	3	4	3	3	2	3	3	2	3	4	3	3	3	2	3	3	3	3	3	3	3	3	2	2	3	3	3	2	3	2	3	3	3	4	4	3	4	4	4	5	3	5
20	2	Yes	2	4	4	3	3	3	3	3	4	3	4	3	4	4	4	4	4	4	3	4	4	4	4	4	4	3	4	4	3	4	4	4	2	3	3	3	4	4	5	3	4	4	2	3	5	4	5
26	1	Yes	2	3	4	3	3	3	3	4	3	3	3	2	3	3	3	3	3	2	3	3	3	3	3	3	3	4	3	3	2	2	3	3	2	3	3	3	3	3	4	2	3	3	3	2	4	4	4
28	1	Yes	1	2	3	4	3	4	3	3	3	3	3	3	4	3	3	3	3	3	3	3	3	3	2	3	3	3	3	3	2	3	3	3	3	3	2	2	3	3	5	4	3	3	3	3	4	4	4
23	1	Yes	2	4	4	3	3	3	3	3	3	3	3	1	4	3	3	3	4	3	3	3	4	3	4	3	3	4	4	3	3	3	3	3	3	3	3	2	2	3	4	3	4	2	3	4	5	3	4
18	2	Yes	2	4	3	3	4	3	3	2	4	3	4	3	4	4	3	4	4	3	4	4	4	4	3	4	3	3	3	2	3	3	3	2	2	4	3	3	4	4	5	2	2	3	2	4	5	5	4
25	2	Yes	2	4	3	2	3	2	3	3	3	3	2	2	3	4	3	4	3	3	3	3	3	2	4	3	3	3	3	2	1	2	2	2	2	3	2	2	3	3	3	4	4	4	2	4	4	4	4
28	1	Yes	1	3	3	2	3	2	3	2	3	3	3	2	3	3	3	3	3	3	3	3	3	3	2	3	3	2	2	2	3	3	2	2	2	3	2	3	3	3	4	2	2	2	2	3	5	4	3
22	2	Yes	1	4	4	3	4	3	4	4	4	4	2	2	3	4	4	4	4	4	3	4	3	3	4	4	4	4	4	4	3	4	4	3	2	4	4	4	4	4	5	3	5	5	5	5	5	5	5
28	2	Yes	1	3	3	3	3	2	2	2	4	3	3	2	2	4	3	3	3	3	3	3	4	3	3	3	2	3	3	1	2	3	3	2	2	3	3	2	2	3	5	2	4	4	3	3	4	4	3
26	2	Yes	2	3	4	3	4	3	3	3	3	3	4	3	2	4	3	4	4	3	4	3	3	3	4	4	3	4	3	3	3	3	3	3	2	3	3	2	3	3	5	4	2	3	4	4	5	5	5
32	1	Yes	1	3	3	3	4	3	3	3	4	3	3	1	4	3	3	4	4	3	3	3	3	3	2	3	3	4	3	3	1	3	3	3	2	2	3	3	3	3	5	4	4	4	3	5	5	5	4
28	1	Yes	1	4	4	3	4	3	3	3	4	4	2	2	4	3	4	3	4	3	4	3	3	3	4	3	3	3	3	3	2	4	3	3	3	3	3	3	3	4	5	4	4	4	3	4	5	5	5
27	2	Yes	1	4	4	3	4	3	3	4	4	3	4	2	2	4	4	3	4	3	3	3	4	3	3	4	2	3	4	2	3	4	4	3	3	4	3	3	3	4	5	4	5	4	3	5	5	5	5
21	2	Yes	1	3	2	2	2	2	2	2	2	2	2	3	2	2	2	3	3	2	2	3	3	2	3	2	2	2	3	2	2	2	2	2	2	3	2	2	3	2	3	3	3	2	4	3	3	4	4
27	2	Yes	2	4	4	3	4	4	3	3	4	4	4	2	3	3	3	4	4	3	4	3	3	2	4	3	3	3	3	4	3	4	4	3	2	3	3	3	3	3	5	4	3	3	4	4	5	5	5
27	2	Yes	1	2	4	3	4	3	3	3	4	4	2	1	4	4	3	4	3	3	3	3	3	3	4	4	4	4	4	3	2	3	3	3	2	4	3	3	3	3	5	4	3	2	4	5	5	5	4
25	2	Yes	1	3	4	3	3	3	3	4	4	3	3	2	3	4	4	4	3	3	3	3	3	2	3	3	3	4	3	2	3	3	3	3	2	2	3	2	3	3	5	5	5	4	4	4	4	5	4
25	1	Yes	1	4	4	3	4	4	4	4	4	4	4	3	2	3	4	4	4	4	4	4	4	4	3	4	4	4	4	4	2	3	4	4	2	4	4	4	4	3	5	4	4	3	4	4	5	5	5
32	1	No	2	3	4	4	4	4	4	4	4	4	4	2	3	4	4	4	3	4	4	4	4	4	3	4	4	2	4	4	3	3	4	4	3	3	4	4	3	4	5	5	5	2	4	5	5	5	5
28	2	Yes	1	4	4	2	4	3	3	3	4	4	4	2	3	4	4	4	4	4	3	4	4	3	4	4	3	3	4	3	3	4	4	3	3	4	3	4	4	4	5	4	4	4	4	4	5	5	5
28	2	Yes	1	3	3	3	4	3	3	3	4	4	4	2	3	4	3	3	4	3	3	4	4	3	3	4	3	3	3	3	4	3	4	4	2	3	3	3	3	2	5	5	5	5	5	5	5	5	5
26	2	Yes	1	4	4	3	4	3	3	4	4	3	4	3	2	3	3	3	4	3	3	4	4	2	4	3	3	3	3	4	3	3	3	3	4	3	3	3	4	4	5	3	2	3	4	4	5	5	5
20	1	Yes	2	4	3	3	2	2	2	2	3	2	2	2	3	3	3	3	4	2	2	3	3	2	3	2	3	1	3	1	1	3	2	2	1	3	3	1	3	3	3	2	3	2	1	1	3	1	1
25	1	Yes	1	2	4	3	4	3	3	4	4	3	4	2	2	4	3	3	4	4	4	4	4	4	3	4	3	3	3	3	2	3	4	3	3	4	3	4	4	3	4	4	5	4	4	5	5	5	3
25	2	Yes	1	2	4	3	4	3	3	3	4	3	4	2	3	3	2	4	4	3	3	3	3	3	3	3	3	3	2	3	1	3	3	3	2	3	3	3	4	3	5	4	5	5	3	4	5	5	4
23	1	Yes	1	4	3	3	3	3	2	3	3	3	2	1	4	3	3	3	4	3	2	4	3	2	3	3	2	2	3	3	1	3	3	3	2	2	4	3	4	4	4	4	5	5	2	4	5	2	3
25	1	Yes	2	3	2	3	3	4	2	3	4	3	2	1	3	3	4	3	4	3	3	3	3	3	3	3	3	3	4	3	2	4	3	3	3	3	3	3	4	3	4	4	5	5	4	4	5	3	4
57	2	Yes	2	3	4	3	4	4	4	4	3	4	3	3	3	3	4	4	3	4	4	4	4	3	2	3	4	4	4	3	3	4	4	4	3	4	4	3	4	3	5	4	4	4	4	4	5	5	5
56	1	Yes	1	2	2	3	3	3	3	2	3	3	3	3	3	3	3	3	4	3	2	3	3	2	3	3	3	2	3	1	2	2	3	2	3	2	3	3	3	2	3	4	5	4	4	4	4	5	4
22	1	Yes	2	4	4	3	3	3	4	3	3	3	3	2	4	3	3	3	3	2	3	3	4	2	3	3	3	2	3	1	1	3	3	3	3	3	3	4	3	3	4	3	3	3	4	3	4	2	4
18	1	Yes	2	2	3	3	3	3	3	2	3	2	2	2	4	3	3	3	4	3	2	3	4	2	2	3	3	3	4	1	3	3	3	3	2	3	3	2	4	3	5	3	4	4	4	5	5	5	5
25	2	Yes	1	3	4	4	4	3	3	4	3	4	4	2	4	4	3	4	4	3	3	4	4	3	1	4	3	3	3	2	3	3	4	3	2	2	4	4	4	3	5	4	3	3	2	3	5	5	5
26	1	Yes	1	4	4	3	4	3	3	3	4	4	4	1	3	3	3	4	4	3	4	4	4	2	4	4	4	4	4	4	3	4	4	3	2	4	3	4	3	4	5	5	5	5	3	4	5	4	5
20	2	Yes	2	3	3	3	4	3	3	3	4	4	4	2	3	4	3	4	4	3	3	3	4	2	3	3	4	4	4	3	2	3	3	3	3	4	3	2	4	4	5	4	3	4	3	4	4	4	4
49	2	Yes	1	4	4	3	4	3	3	3	4	3	3	2	1	4	3	3	4	4	3	4	4	4	4	4	4	4	4	2	2	4	4	3	1	4	3	2	4	4	5	4	3	3	2	5	5	5	4
22	2	Yes	1	3	3	2	2	3	3	3	3	2	2	3	3	3	3	3	3	3	2	4	3	3	3	3	3	2	3	2	2	2	2	3	2	3	2	2	3	3	4	3	2	2	1	4	5	5	4
30	1	Yes	1	4	3	3	2	3	4	3	4	3	3	2	4	3	3	4	4	3	3	3	3	3	3	3	3	2	4	2	2	3	3	3	3	4	3	3	3	3	5	2	4	3	1	3	5	5	5
30	2	Yes	1	4	3	2	3	3	3	3	4	3	2	1	2	4	3	2	3	3	2	3	4	3	3	3	3	2	3	2	1	3	3	3	2	3	2	3	3	3	4	4	4	3	4	3	5	5	5
20	2	Yes	2	4	4	2	4	2	3	2	4	3	4	4	2	3	3	4	4	3	3	4	4	4	4	4	3	3	4	3	4	3	3	2	1	4	3	1	3	3	5	2	1	1	1	3	5	5	5
22	2	No	2	1	4	2	4	3	4	4	4	4	3	1	3	4	4	4	4	4	4	4	4	4	4	4	4	4	4	4	1	4	4	4	2	4	4	4	4	4	5	4	5	4	5	5	5	5	5
18	2	Yes	2	4	3	3	4	2	3	2	4	3	4	2	3	4	3	4	4	4	3	3	3	4	3	3	3	3	3	4	2	3	4	3	2	3	3	3	4	4	5	3	2	3	3	3	4	4	5
21	1	Yes	2	3	4	4	4	4	4	4	4	3	3	3	4	4	4	3	3	3	3	4	4	4	4	4	4	2	4	4	3	3	3	3	3	4	4	4	3	4	5	4	4	4	4	4	5	5	5
28	2	Yes	1	4	4	3	4	3	4	4	4	4	4	2	1	3	3	4	4	3	3	3	3	3	4	4	3	4	3	4	3	4	4	3	1	3	3	3	4	3	5	3	3	3	3	4	5	5	5
51	2	Yes	1	2	4	3	4	2	3	4	4	3	3	2	2	4	3	4	4	4	3	3	4	3	1	4	3	4	3	4	4	3	3	3	2	4	3	3	3	3	4	3	5	3	4	5	5	5	4
23	1	Yes	2	4	3	3	4	2	2	3	4	3	4	3	3	4	3	4	4	4	3	3	4	3	4	4	4	3	4	3	4	3	2	3	1	4	4	2	3	3	5	3	3	3	4	3	5	5	5
28	2	No	2	2	3	4	4	4	3	4	4	4	4	4	2	3	3	3	4	3	3	4	4	3	4	3	3	4	4	4	4	3	4	4	2	3	4	3	3	3	5	3	3	2	2	4	4	4	5
25	1	Yes	1	4	3	2	3	2	3	3	3	2	3	3	3	2	3	3	3	4	2	2	3	3	3	3	2	2	3	2	3	2	2	2	1	3	2	1	2	3	4	4	3	3	2	4	4	3	3
23	2	No	2	3	4	4	4	4	3	4	4	4	4	2	4	3	3	4	4	2	4	4	3	2	4	4	3	2	3	4	2	4	3	4	2	4	4	4	4	4	3	5	5	5	5	5	5	5	5
24	2	Yes	2	3	4	3	4	3	4	3	4	3	4	2	2	3	3	2	4	3	4	3	3	4	4	3	3	4	3	3	3	3	4	3	2	4	3	3	3	3	4	3	3	4	3	3	4	4	4
18	1	Yes	2	3	2	3	2	1	2	1	3	2	3	2	2	3	3	3	4	3	3	3	3	2	3	3	3	2	3	2	3	3	2	2	1	3	2	2	3	3	3	2	2	2	2	4	5	4	3
27	2	Yes	1	4	4	3	4	2	3	3	4	3	4	3	3	4	3	2	4	3	3	4	4	3	4	4	3	3	4	3	4	3	3	3	2	3	3	4	4	4	4	4	3	3	2	3	5	5	4
28	2	Yes	1	3	4	3	3	3	3	3	3	3	3	1	2	4	3	3	4	3	3	3	2	3	3	4	3	3	3	3	2	3	3	3	3	3	3	4	2	3	4	5	5	4	4	4	5	5	4
28	1	Yes	1	4	4	3	4	4	4	4	4	4	4	1	3	4	4	4	3	3	3	4	4	4	4	3	4	4	4	4	3	4	4	4	3	4	4	2	3	3	5	4	4	4	3	5	5	5	5
22	2	No	2	3	3	3	3	2	3	3	3	3	2	3	3	3	3	3	3	3	1	3	3	3	3	2	3	3	2	2	2	3	3	3	2	3	3	3	3	3	4	4	4	4	4	4	4	4	4
28	2	Yes	1	4	4	3	3	4	4	3	4	4	3	3	1	4	3	3	4	3	4	4	4	4	4	3	4	3	3	3	3	4	3	4	3	3	3	3	3	3	4	3	3	2	3	4	5	5	5
31	1	Yes	1	3	4	3	3	3	4	4	4	3	3	2	3	4	2	4	4	2	3	4	4	3	3	4	3	4	4	1	2	3	3	3	3	3	3	3	3	3	5	4	5	4	5	4	5	3	5
19	1	Yes	2	4	4	3	4	3	3	4	4	3	4	2	4	3	4	4	4	3	3	4	3	4	4	4	4	4	4	3	4	4	4	3	3	4	3	3	3	4	5	4	4	4	3	4	4	4	4
22	2	No	2	3	4	3	4	3	4	4	4	4	4	1	4	3	3	4	4	2	4	4	4	2	3	4	3	4	4	4	1	3	3	3	2	3	3	3	4	4	5	5	5	5	3	3	5	5	5
28	2	Yes	2	3	4	3	2	4	3	3	4	4	3	2	3	4	4	3	4	3	2	3	4	3	2	3	4	3	3	2	3	4	3	3	2	3	3	3	3	4	5	1	3	3	2	3	4	1	5
19	2	Yes	2	4	3	3	4	3	4	4	3	4	3	2	4	4	4	3	4	3	3	3	4	1	4	4	3	3	4	3	1	3	3	2	3	3	3	3	3	4	4	4	5	5	4	5	5	4	4
26	1	Yes	2	3	4	3	3	3	4	4	4	3	3	2	3	4	3	4	4	3	3	4	3	3	3	3	3	3	4	1	2	3	3	3	3	4	3	3	4	3	5	4	4	4	4	4	5	5	5
19	1	Yes	2	4	4	4	3	4	4	4	4	4	3	1	4	4	4	4	4	4	3	4	3	4	4	4	4	4	4	4	2	4	3	4	4	4	4	2	4	4	5	5	5	5	5	5	5	5	5
28	2	Yes	1	2	4	4	4	4	3	4	4	4	3	1	2	4	3	3	4	4	3	4	4	3	4	4	4	3	3	2	2	3	4	3	2	3	3	4	4	2	5	4	4	4	4	5	5	5	5
26	2	Yes	1	4	4	3	3	3	3	3	3	4	3	2	1	3	2	3	3	3	3	3	3	3	3	4	3	2	3	3	2	3	3	3	3	3	4	3	3	2	5	4	5	4	4	4	4	5	5
23	1	Yes	1	4	4	4	4	4	4	4	4	4	1	1	4	4	4	4	3	4	4	4	4	4	1	4	4	4	4	3	1	4	4	4	4	4	4	4	4	4	3	5	5	5	5	5	5	5	5
26	1	Yes	1	4	3	3	3	1	2	3	3	3	1	1	2	4	4	3	4	3	2	3	3	3	3	3	3	2	3	3	2	3	3	3	1	3	3	2	3	3	5	4	4	3	5	4	5	5	5
21	1	Yes	1	3	4	3	4	3	3	3	4	3	3	2	3	4	3	4	2	3	3	4	3	3	3	3	3	2	3	3	2	4	4	4	3	4	4	2	3	2	5	5	3	3	3	4	5	5	5
28	2	Yes	2	3	4	4	4	4	3	4	4	4	2	1	3	2	4	4	2	3	3	4	4	2	4	3	4	4	4	3	1	4	4	4	2	4	4	4	4	4	5	4	5	2	3	3	5	5	5
59	2	Yes	1	4	4	3	4	3	3	4	4	3	2	1	2	4	3	4	3	3	4	4	3	2	2	3	3	3	3	2	3	4	3	3	3	3	3	3	3	4	5	4	5	4	3	5	5	5	5
27	1	Yes	2	4	3	2	4	2	2	3	4	2	3	2	2	3	3	3	1	3	3	3	3	3	3	3	3	2	2	2	2	3	3	2	2	2	2	2	3	4	5	1	2	2	1	3	5	5	4
35	2	Yes	1	2	4	3	2	4	4	3	3	3	2	2	3	4	4	3	4	3	2	4	4	3	4	4	3	4	4	2	2	4	4	3	4	4	4	3	4	4	5	3	5	3	4	5	5	4	5
27	1	Yes	1	3	4	3	4	3	3	3	3	3	3	2	4	3	3	1	3	3	3	3	3	3	3	3	3	3	4	3	2	3	3	3	3	3	3	3	3	4	5	4	4	3	4	4	5	5	5
24	1	Yes	2	3	4	3	3	2	3	3	4	4	2	2	4	3	4	3	4	3	3	3	3	2	3	3	3	4	2	2	2	2	2	3	4	2	3	3	3	4	4	3	4	4	4	3	4	3	3
23	2	Yes	1	3	4	3	4	4	4	3	4	4	4	3	2	4	3	4	4	2	4	4	4	3	4	3	3	3	3	3	4	2	3	4	2	3	3	4	3	3	4	2	3	2	2	2	5	5	5
26	2	Yes	2	3	4	2	3	2	3	3	3	3	2	1	3	2	3	3	2	2	2	2	3	3	3	3	2	2	3	3	1	2	2	2	3	2	2	2	2	2	4	3	3	3	4	4	5	3	5
32	1	Yes	1	3	2	3	2	4	2	2	3	2	2	2	4	3	4	3	4	4	2	3	2	3	2	3	3	2	3	1	2	4	2	2	4	3	3	1	3	4	3	3	4	3	2	4	5	5	3
27	2	Yes	1	3	3	4	4	3	3	3	4	2	3	3	2	4	3	3	4	3	4	4	3	3	3	3	3	2	4	3	3	3	4	2	3	4	4	3	3	3	5	3	2	1	1	4	5	5	5
51	2	Yes	2	3	3	3	4	4	2	3	4	2	3	3	4	3	4	4	3	3	4	4	4	3	4	3	4	3	3	2	4	3	3	3	1	3	4	3	3	4	5	3	5	3	5	4	5	5	5
40	1	Yes	1	3	4	3	4	4	4	3	3	3	2	1	2	3	1	4	4	3	3	4	3	3	3	3	4	2	3	1	2	3	3	3	2	3	3	3	3	3	4	3	3	3	3	2	4	2	4
46	2	Yes	1	4	4	2	4	4	3	3	4	2	4	3	1	3	4	3	4	3	2	3	3	3	1	4	3	3	3	2	4	3	3	3	1	4	3	3	3	3	4	4	3	3	4	4	5	5	4
37	1	Yes	1	4	2	4	2	4	3	2	3	2	3	1	4	3	4	3	3	2	1	3	3	3	3	2	2	2	3	1	1	4	3	4	4	3	3	2	3	4	3	4	4	4	2	2	4	4	5
25	2	Yes	2	4	4	3	3	2	3	2	4	4	4	3	4	3	3	3	4	3	4	3	4	4	3	4	3	4	3	3	3	3	3	2	1	3	2	3	4	4	4	4	5	5	4	5	5	5	4
24	1	Yes	1	4	4	2	4	3	3	3	3	3	2	1	4	4	3	3	4	2	3	2	3	2	1	3	2	2	3	3	1	3	2	2	1	4	3	2	4	4	5	4	3	4	1	1	5	5	3
24	1	Yes	2	2	3	4	3	4	2	3	4	3	4	1	3	3	3	3	4	3	3	4	3	4	3	4	3	3	3	1	2	3	3	3	1	3	3	2	3	3	4	4	3	4	4	3	5	5	4
27	1	Yes	1	2	2	2	3	2	3	2	4	2	2	3	3	3	3	2	3	3	2	3	4	4	1	3	3	1	3	1	3	2	1	2	1	4	3	1	2	4	4	1	3	3	1	4	5	5	4
23	1	Yes	2	4	3	4	4	2	2	3	4	3	3	2	4	3	3	3	4	3	2	4	4	3	2	4	4	4	4	1	2	3	4	3	3	3	3	3	3	4	4	4	5	5	4	5	5	5	5
26	1	Yes	2	4	4	3	4	4	4	4	4	4	2	1	4	4	4	4	4	4	3	4	4	2	4	4	4	2	4	2	1	4	2	4	2	4	3	4	4	4	3	3	3	4	5	5	5	5	4
26	2	Yes	1	3	4	1	4	2	3	3	4	4	4	2	3	4	4	3	4	3	3	3	4	2	2	4	3	4	4	3	1	3	3	2	2	4	3	2	3	4	4	4	3	3	4	5	5	5	5
42	2	Yes	1	4	4	3	4	4	2	2	4	3	3	2	3	4	3	3	4	3	3	3	4	4	4	4	4	3	4	1	3	3	3	1	1	4	3	3	4	2	5	4	3	3	2	3	4	3	3
25	2	Yes	2	3	4	4	4	4	3	4	3	3	3	3	3	4	3	3	3	3	4	3	3	2	3	3	4	3	3	3	2	4	4	3	3	4	4	4	3	3	4	3	3	4	4	4	5	5	5
49	2	Yes	1	4	2	2	4	3	2	2	4	2	4	1	4	4	3	3	3	4	3	2	3	4	2	4	3	4	4	2	2	4	3	3	1	4	3	3	3	4	4	4	5	2	5	4	5	1	5
27	2	Yes	1	2	4	3	4	3	3	3	3	4	4	2	2	4	3	4	3	4	3	4	2	4	3	3	3	2	3	3	2	4	3	3	2	3	3	3	3	3	4	4	4	4	3	4	5	5	5
25	2	Yes	1	3	4	3	4	2	4	4	4	4	4	3	3	3	3	4	4	4	4	4	4	3	3	3	3	4	4	3	3	4	4	3	1	2	4	3	3	4	5	3	4	3	2	2	3	5	5
51	2	Yes	2	3	3	3	4	3	2	3	4	3	4	2	3	3	3	4	3	3	3	3	3	2	2	2	2	2	2	1	3	2	3	2	3	3	3	3	3	4	4	2	3	4	5	5	5	5	5
22	2	Yes	2	2	3	2	4	4	3	3	3	3	4	2	4	3	2	2	3	3	3	3	3	2	2	3	3	3	4	2	2	3	3	2	1	3	2	1	2	3	2	4	4	4	5	5	5	5	2
20	1	Yes	2	4	4	3	4	3	3	4	4	4	2	1	3	3	3	4	3	2	4	3	3	1	4	3	2	2	4	2	1	3	3	3	2	4	3	2	4	3	5	4	4	1	2	1	5	5	4
18	2	Yes	2	4	3	3	2	3	4	1	3	3	2	2	4	2	3	3	3	3	3	4	3	3	3	2	4	2	3	2	3	2	3	3	3	2	3	3	3	3	4	3	3	2	2	4	4	2	2
18	2	Yes	2	3	4	3	3	3	4	4	4	4	2	3	1	3	3	3	4	3	3	3	4	2	3	3	3	3	3	3	1	3	3	3	2	3	3	3	2	3	4	3	3	3	3	4	5	5	4
21	1	Yes	2	4	2	3	3	4	2	3	4	3	4	1	4	3	3	3	4	2	2	4	3	2	2	3	3	2	3	3	1	3	4	3	3	1	3	4	4	3	3	4	3	4	3	3	5	5	5
27	2	Yes	2	3	4	3	4	4	4	4	2	3	4	2	4	4	2	3	4	3	4	4	4	3	4	4	4	4	4	4	4	4	4	3	2	4	3	4	4	3	5	3	4	4	4	4	4	5	5
22	1	Yes	2	3	3	3	4	3	2	3	4	3	3	2	2	3	2	3	4	2	3	3	3	2	3	3	3	3	4	1	2	2	3	2	2	3	3	4	3	2	5	4	4	3	4	4	5	5	4
23	2	Yes	2	3	3	2	4	2	2	3	4	3	4	2	4	3	3	3	4	3	3	3	3	1	3	3	3	3	3	2	4	3	2	2	1	4	3	2	3	4	2	2	4	3	2	2	4	1	4
27	1	Yes	1	3	3	3	3	2	3	2	3	2	3	3	3	3	2	2	4	2	3	2	2	2	3	2	3	2	3	1	4	3	2	2	2	3	2	2	2	3	5	2	2	2	1	3	5	5	5
27	2	Yes	1	4	4	4	3	3	4	3	3	4	2	1	3	3	4	4	3	3	4	4	4	4	3	3	4	2	4	3	3	4	4	4	3	4	3	3	3	4	4	4	3	4	3	2	5	5	5
47	2	Yes	1	4	4	3	4	2	3	4	4	4	3	2	2	4	4	4	1	4	4	3	4	3	4	4	3	4	4	2	3	4	3	3	3	4	3	3	4	4	5	3	2	4	4	4	5	5	5
25	1	Yes	1	3	3	4	3	4	3	3	4	4	3	2	3	4	4	2	2	2	3	4	4	2	4	3	3	4	3	1	2	2	4	4	4	3	4	3	4	4	5	5	5	5	5	4	5	4	5
20	1	Yes	2	3	4	3	3	3	3	3	4	3	3	1	3	2	2	2	4	2	3	2	3	1	2	2	3	2	2	2	2	2	1	2	2	2	3	2	2	4	3	2	2	1	2	2	5	5	3
27	2	Yes	1	1	4	4	4	3	4	3	4	3	4	3	4	4	4	4	4	3	3	4	4	4	4	4	3	4	4	4	3	4	4	3	3	4	4	4	1	3	5	4	5	4	4	5	5	5	5
60	2	Yes	1	4	3	3	3	3	2	3	3	2	3	3	4	4	3	4	4	4	3	2	4	3	2	3	3	3	4	3	2	3	2	2	1	2	2	2	2	4	5	4	4	2	4	2	4	1	5
19	1	Yes	1	3	4	3	4	3	3	3	4	4	3	3	3	4	3	3	3	2	4	3	3	3	3	3	4	4	3	1	3	3	2	2	3	2	2	4	3	3	5	3	5	4	2	4	5	5	5
26	1	Yes	1	2	3	3	2	3	2	2	3	2	2	1	3	2	3	2	4	3	2	3	2	1	2	3	3	3	3	2	2	1	3	2	2	2	2	2	3	2	2	2	2	2	3	2	3	4	4
46	1	Yes	1	2	2	3	1	2	2	2	3	2	3	2	2	2	3	3	3	3	2	2	3	3	2	3	3	3	3	3	3	2	3	3	2	3	2	2	3	4	3	2	1	2	1	3	3	4	3
26	2	Yes	1	3	2	4	2	4	2	2	3	2	3	2	4	3	3	4	4	2	3	3	4	3	3	3	3	1	3	1	1	2	3	3	2	3	3	3	3	3	4	4	3	2	3	4	5	4	4
33	1	Yes	1	3	4	3	4	3	4	3	4	4	3	2	4	4	3	4	3	3	3	3	3	2	2	4	3	3	4	3	2	3	1	3	3	4	3	3	1	4	5	4	5	4	5	5	5	5	5
26	2	Yes	1	3	4	4	4	3	4	4	4	4	2	1	4	4	4	4	2	4	2	4	4	2	4	4	4	2	3	2	2	4	3	4	3	3	4	4	3	3	4	3	3	3	4	4	5	5	5
25	1	Yes	2	4	4	4	2	3	4	3	4	3	4	1	4	4	2	4	4	2	3	4	4	3	2	3	3	2	3	3	2	3	2	4	4	4	4	3	4	3	5	4	5	3	1	2	5	5	5
22	2	Yes	2	3	3	4	2	3	4	2	4	3	2	2	3	3	3	4	2	3	2	4	4	2	1	2	3	2	3	4	2	2	4	3	3	3	3	3	3	3	2	3	3	1	2	2	4	2	1
27	2	Yes	1	3	4	4	4	4	4	4	4	4	3	2	4	3	3	4	4	3	4	4	4	4	1	3	3	3	3	4	4	3	4	4	4	1	4	4	4	2	3	4	5	4	4	4	4	5	4
18	2	Yes	2	4	4	4	4	3	4	1	4	4	3	2	4	4	4	4	4	3	2	4	4	3	4	4	4	4	4	4	2	3	4	3	2	4	3	4	3	4	4	4	5	5	4	5	5	5	5
33	2	No	2	4	4	4	4	4	4	1	4	4	4	3	4	3	4	2	4	3	4	4	4	3	3	4	3	3	3	3	2	3	3	4	1	4	4	4	4	4	4	5	5	5	3	3	5	5	4
27	2	Yes	2	4	3	4	2	4	3	4	4	4	4	3	2	3	4	3	4	2	2	4	4	3	3	4	4	3	3	4	3	3	4	4	2	4	3	4	4	3	5	4	3	2	4	4	5	5	5
18	1	Yes	2	4	4	2	3	3	4	3	4	3	4	1	2	4	3	4	4	4	4	3	3	4	4	3	3	4	4	1	3	4	3	3	3	4	3	3	2	4	5	4	4	3	3	4	5	5	4
28	2	Yes	2	4	4	4	4	4	4	3	3	3	4	2	4	3	4	4	1	3	3	4	4	4	4	4	3	4	4	4	1	3	3	3	2	4	4	4	3	4	4	5	5	4	4	4	5	5	5
29	2	No	2	4	4	4	4	2	4	2	4	2	3	2	2	3	3	4	4	4	4	4	4	4	4	3	4	3	4	4	3	4	3	4	3	4	4	4	4	3	5	5	5	5	5	5	5	4	5
23	1	Yes	2	1	4	3	4	3	4	4	4	3	3	2	3	4	4	3	4	4	4	4	4	3	4	4	3	3	4	4	4	4	3	3	3	1	2	3	4	4	5	3	3	2	4	4	5	5	5
30	1	Yes	1	2	3	3	3	3	3	2	4	3	3	2	3	2	3	2	2	3	2	3	3	3	3	3	4	1	1	2	2	3	3	3	3	3	4	4	3	3	4	4	4	4	4	4	4	4	4
26	1	No	2	4	3	3	3	3	3	2	4	2	3	2	4	3	4	4	4	4	2	2	4	3	3	4	3	4	3	2	2	3	1	3	3	3	1	3	4	4	4	4	5	4	4	4	5	5	4
27	2	Yes	2	3	2	3	1	3	3	1	4	3	3	2	2	4	3	3	4	4	2	3	3	3	3	3	3	3	3	1	2	2	3	2	3	3	2	2	4	3	4	3	4	4	4	5	5	4	5
21	2	Yes	2	4	4	3	4	1	3	2	4	4	4	3	4	4	3	4	4	3	3	3	4	4	4	4	3	4	3	2	2	2	1	1	1	4	2	2	3	4	5	3	3	2	4	2	5	5	5
24	1	Yes	1	4	3	3	2	3	2	2	2	2	1	1	4	2	3	2	4	1	1	3	4	1	3	2	4	2	3	1	2	1	2	4	4	1	3	2	3	4	2	1	2	4	3	2	5	5	5
19	1	Yes	2	3	2	4	3	3	2	2	1	3	3	1	4	3	3	3	4	2	3	3	3	2	3	3	3	3	3	1	2	3	2	3	3	3	3	2	3	3	5	4	4	4	4	3	4	4	4
28	2	Yes	2	3	4	3	3	3	3	3	3	4	3	2	1	4	4	3	4	3	2	4	3	3	2	2	4	2	4	4	2	4	3	4	2	3	4	3	2	3	5	4	4	4	5	3	5	5	5
32	2	No	1	4	4	4	4	4	4	4	4	4	4	2	3	4	4	4	1	3	3	4	4	3	3	4	3	1	4	3	2	4	4	4	3	3	4	3	4	4	3	5	5	3	4	5	5	5	5
26	2	Yes	1	4	2	2	4	2	3	2	4	1	3	2	3	4	4	4	4	4	2	2	3	1	2	3	2	3	3	2	3	2	2	2	2	3	2	3	3	4	4	4	4	4	4	4	4	4	4
27	1	Yes	1	4	3	1	4	3	3	4	3	2	3	2	4	3	2	4	2	2	3	4	4	2	2	3	3	2	3	2	2	3	3	3	3	1	3	2	2	3	4	2	2	2	3	3	4	3	3
18	1	Yes	2	4	3	3	4	2	1	2	3	2	3	3	4	4	2	4	4	4	1	3	3	4	4	3	4	3	4	2	2	4	3	2	1	4	2	1	2	4	4	4	3	2	5	4	5	5	5
23	1	Yes	2	3	4	3	3	3	4	4	4	3	3	1	4	4	4	1	4	3	4	4	4	3	3	3	3	3	4	3	2	3	3	2	3	4	3	2	3	4	4	4	5	4	3	3	5	5	5
25	2	Yes	1	4	4	4	4	4	4	4	4	4	4	4	4	4	4	4	4	4	4	4	4	4	4	4	4	4	4	4	4	4	4	4	1	4	4	1	1	4	5	5	5	5	5	5	5	5	5
25	1	Yes	2	4	4	3	4	3	4	4	3	4	3	3	2	4	4	1	4	3	4	4	3	3	4	3	3	3	4	4	3	4	4	3	2	3	2	2	4	3	5	4	4	4	4	5	4	5	5
20	1	Yes	2	3	4	2	4	3	1	2	2	3	3	2	3	4	2	3	3	3	3	3	3	3	3	3	3	3	2	1	2	3	2	3	2	3	2	3	3	3	4	2	4	4	3	4	4	5	3
26	2	Yes	1	3	2	3	2	2	2	1	3	2	2	3	2	2	3	1	2	2	2	4	3	2	4	3	3	3	2	1	2	3	2	2	1	3	3	3	3	2	4	3	4	3	1	3	5	1	1
23	1	Yes	2	3	2	2	3	1	2	3	4	2	1	3	3	4	3	3	4	3	3	3	4	2	4	4	4	2	3	1	3	2	1	2	1	4	2	2	4	3	5	2	3	4	1	1	5	5	4
25	1	Yes	1	4	2	3	3	3	1	2	4	2	1	1	3	3	3	2	3	2	2	3	2	3	3	2	3	2	2	2	2	3	2	3	3	2	3	4	4	4	3	4	5	4	5	5	5	1	3
26	2	Yes	1	4	4	3	3	2	3	4	4	2	4	3	3	4	3	3	1	3	4	4	3	3	4	3	3	2	3	3	3	3	4	4	4	3	3	3	4	3	4	4	3	3	4	4	5	5	5
51	2	Yes	2	4	4	2	4	2	4	4	4	4	2	1	3	4	4	4	4	3	2	4	4	4	2	3	3	2	4	3	2	3	4	2	3	4	4	4	4	4	5	4	4	3	2	3	5	5	5
27	1	Yes	1	3	3	1	4	3	3	3	4	3	4	4	2	3	2	4	4	4	3	2	4	4	2	3	3	3	4	3	4	3	1	2	2	4	2	2	3	4	4	4	5	3	4	5	5	5	5
30	2	Yes	2	4	4	3	2	2	1	2	4	3	3	1	2	4	4	3	3	4	2	3	3	4	4	4	4	3	3	2	1	4	2	2	3	4	3	2	1	4	4	5	5	5	5	5	5	5	5
19	1	Yes	2	4	4	3	3	3	4	2	2	2	2	1	4	1	3	4	1	3	2	3	4	2	3	3	3	2	3	1	1	2	2	2	2	4	3	3	3	3	5	1	2	3	1	1	5	3	3
23	1	Yes	1	3	4	3	4	3	3	1	4	3	2	3	3	3	2	2	3	2	1	3	4	2	1	3	2	3	2	1	3	1	2	3	1	2	3	2	4	3	5	3	4	2	1	3	5	5	4
20	2	Yes	1	4	3	3	4	3	2	4	4	4	4	4	4	4	3	4	4	4	3	4	3	4	4	4	3	4	4	1	4	4	4	4	1	4	4	1	4	4	4	2	3	1	1	4	5	5	2
26	2	Yes	1	2	4	2	4	3	4	4	3	3	4	2	2	3	4	4	4	1	4	4	4	1	4	4	4	3	4	4	2	3	3	3	2	4	4	4	4	3	5	5	3	4	5	5	5	5	5
20	2	Yes	2	2	4	3	4	3	3	3	2	3	4	1	4	4	3	2	4	2	4	4	4	4	3	3	4	4	3	3	3	3	3	3	2	1	3	3	3	2	5	2	3	2	1	4	5	5	4
24	2	No	2	3	4	3	3	4	4	4	4	4	4	2	2	3	3	4	4	4	2	4	4	3	4	4	4	3	4	4	3	3	2	4	1	3	4	4	1	4	4	4	5	3	4	4	5	4	4
29	2	Yes	1	3	3	1	2	2	2	2	3	1	3	2	4	4	3	4	4	4	2	2	2	2	3	4	3	3	3	4	2	3	2	2	2	3	2	2	2	4	3	4	5	4	3	4	5	5	4
32	1	No	2	4	4	3	4	3	4	1	4	4	3	1	4	4	3	4	4	3	3	3	3	3	2	3	3	3	2	3	1	3	2	3	2	4	4	3	3	2	5	4	4	4	4	4	5	5	5
22	1	Yes	2	2	4	2	2	3	3	3	4	1	2	1	3	4	3	4	4	3	3	3	3	1	3	3	3	3	3	3	2	3	3	2	3	2	1	2	3	3	5	4	4	2	2	2	5	4	4
39	2	Yes	1	3	4	4	4	4	4	4	3	3	3	3	4	3	4	4	4	4	3	4	4	4	4	4	4	4	4	2	3	4	4	4	2	4	1	4	4	4	5	5	5	5	5	5	5	5	5
26	1	Yes	1	4	4	4	4	4	3	4	4	4	3	1	4	4	3	4	3	3	4	4	4	4	1	1	3	3	3	4	1	4	4	3	3	4	4	4	4	4	5	5	4	4	4	4	4	4	4
19	1	Yes	2	3	4	3	4	2	3	2	3	2	4	4	3	3	4	4	2	2	2	4	3	2	4	3	3	4	2	2	3	4	2	3	1	3	3	3	3	3	4	4	4	3	5	4	5	3	4
39	2	No	2	2	2	3	4	4	2	2	3	2	3	3	2	1	2	4	1	2	3	4	4	3	3	3	4	2	3	3	3	3	2	4	1	3	4	2	4	3	4	3	4	4	5	5	5	5	4
24	1	Yes	1	3	4	4	1	3	3	3	2	3	1	1	2	2	4	3	2	3	1	4	4	2	2	1	4	1	2	1	1	1	4	4	3	1	4	4	4	3	2	3	3	2	2	1	4	1	2
21	2	Yes	2	3	4	3	4	4	3	4	4	4	4	3	4	4	2	3	4	3	4	4	4	4	4	3	3	1	4	4	3	4	1	4	2	4	3	3	3	3	4	2	3	3	2	5	5	5	4
29	2	Yes	2	4	3	1	4	1	2	1	4	2	3	1	1	3	3	3	4	4	2	1	2	4	1	2	2	4	3	2	3	4	1	1	1	2	1	1	1	4	4	4	5	4	3	5	5	5	5
27	2	Yes	2	4	4	2	4	3	1	2	4	3	4	3	3	4	4	4	4	4	2	4	4	3	4	4	4	4	4	1	3	4	4	3	1	1	2	3	2	4	5	4	4	4	4	5	5	5	5
32	1	Yes	1	3	4	4	2	4	3	3	4	3	3	3	1	4	3	2	4	3	2	4	4	3	4	3	4	3	4	3	1	3	3	3	2	4	1	3	2	3	4	4	4	3	2	3	5	5	5
27	2	Yes	1	4	3	4	3	2	2	1	3	1	3	4	1	3	3	4	4	4	3	4	4	4	2	3	3	2	3	1	2	3	2	3	3	4	3	1	3	3	4	2	2	2	1	3	5	5	4
40	1	Yes	1	1	1	1	1	2	1	1	1	1	1	1	1	1	1	2	1	1	1	1	1	1	3	1	1	2	1	1	1	1	1	1	3	1	1	1	1	1	3	3	4	2	1	3	4	1	1
23	1	Yes	2	4	3	4	2	3	2	2	4	3	3	2	4	3	3	4	1	3	1	3	4	3	4	3	3	4	4	1	1	4	3	2	2	4	3	4	4	4	3	4	4	4	3	5	5	5	5
18	2	Yes	2	3	4	1	4	2	3	2	4	1	2	1	3	3	3	3	2	1	3	2	4	3	2	3	2	2	3	1	2	3	2	2	1	3	2	1	1	3	5	2	5	2	1	3	5	4	3
25	1	Yes	1	1	2	4	1	3	1	2	4	1	3	2	4	3	4	3	4	2	2	4	2	2	3	3	4	2	2	1	1	3	2	4	2	3	4	4	4	4	5	4	5	5	3	4	4	4	4
40	1	Yes	1	3	4	4	3	3	4	3	2	3	4	1	4	4	3	4	3	2	3	3	3	2	2	3	3	3	3	4	2	4	4	2	1	3	1	2	2	3	4	4	5	4	5	5	4	3	4
27	1	Yes	1	4	4	1	4	3	4	3	4	3	4	1	4	4	4	3	4	3	3	2	4	4	2	4	2	4	4	1	4	4	2	3	2	1	3	1	2	4	4	2	3	3	4	3	5	5	5
18	1	Yes	2	3	4	3	3	1	3	1	4	2	4	1	2	3	1	3	4	4	2	3	4	3	3	3	2	2	3	1	3	2	1	1	3	1	1	3	2	4	5	4	5	4	2	5	5	3	5
20	1	Yes	2	4	3	1	1	1	3	1	3	1	1	3	3	1	2	3	4	3	1	2	3	2	1	1	1	1	2	1	1	2	1	1	1	3	3	1	1	3	1	1	1	1	1	1	5	1	2
33	2	No	2	2	4	4	3	4	4	4	3	1	4	2	3	4	4	3	4	4	3	4	4	4	4	3	4	3	4	4	2	1	4	4	2	4	4	3	3	4	4	4	5	4	4	5	5	5	5
24	1	Yes	2	3	2	3	2	3	2	1	4	3	3	3	4	4	3	3	4	2	4	3	4	2	1	2	1	3	3	1	3	1	2	2	1	2	3	2	1	4	5	3	5	3	2	3	5	5	4
58	2	Yes	1	1	4	4	4	4	4	3	4	4	1	1	2	4	3	3	4	3	1	4	4	4	4	4	1	4	4	1	4	4	4	2	4	4	4	2	4	4	3	5	5	3	5	4	3	5	5
19	1	Yes	2	4	3	3	1	4	3	1	2	2	1	2	2	3	3	1	3	1	1	3	1	3	4	2	3	2	2	2	1	4	2	2	2	3	3	1	2	3	4	5	2	4	3	1	5	1	2
19	1	Yes	2	1	3	4	3	2	2	3	2	2	1	1	4	3	3	3	4	3	3	4	4	4	1	1	4	1	3	3	1	1	2	3	3	3	3	3	4	4	3	4	5	4	4	3	5	5	4
20	2	Yes	2	3	3	4	4	3	2	2	3	3	4	3	3	4	4	3	3	2	3	4	3	4	3	4	4	2	3	4	3	1	4	3	2	3	3	1	3	4	3	3	3	4	2	3	5	5	4
28	1	Yes	1	4	4	2	3	3	2	2	4	3	3	4	3	2	1	4	1	1	3	4	2	1	2	3	4	2	3	3	1	4	3	2	3	4	2	1	4	4	5	4	5	5	5	5	3	4	5
22	2	Yes	1	2	3	1	4	1	2	3	4	2	3	3	2	4	1	4	4	3	3	3	4	4	1	3	2	4	4	3	3	1	1	1	1	2	1	1	1	1	5	3	2	3	1	5	5	2	4
26	1	Yes	2	2	3	2	4	2	2	3	4	3	4	3	3	3	4	3	4	1	3	3	3	2	2	3	3	2	2	2	1	2	4	1	2	2	1	1	1	4	5	4	5	5	5	5	5	5	5
57	2	Yes	2	4	4	3	4	3	1	1	4	4	4	1	3	1	4	4	4	4	4	4	3	2	4	4	4	4	4	4	3	4	4	4	1	4	4	4	4	4	4	4	5	4	5	5	5	5	5
[truncated: 5 more columns]
